# Supplementary material for: Endocardial Endothelial Dysfunction Progressively Disrupts Initially Anti then Pro-Thrombotic Pathways in Heart Failure Mice
Source: PLoS One. 2015 Nov 13;10(11):e0142940. doi: 10.1371/journal.pone.0142940 (PMC4643996; doi:10.1371/journal.pone.0142940)
Supplement: S3 Data — (XLSX) [file pone.0142940.s003.xlsx]

## Sheet: Rate Vmax Calc
SC Concentrations	Vmax OD
	2013-03-04	2013-03-06	2013-04-11	2013-05-17		2013-07-12	2013-10-04	2014-03-11	3/13/14 MC 166	3/13/14 MC 168	3/24/14 CR	3/24/14 WT	2014-03-25	3/26/14 MC 182	3/26/14 WT	3/27/14 Crebs	3/27/14 Wt	2014-03-28	2014-04-24
0	0		0	0.09		0	0	-0.1	-1.7	-0.4	0.7	-1.3	1.08	-0.2	-0.3	-0.7	-0.8	-3.4	1.7
25	3.57		1.13	1.91		1.47	1.91	2.7	2.46	2.46	2.58	3.34	2.42	2.46	2.38	1.75	1.97	1.89	1.9
50	2.31	0	2.06	3.3		3.11	3.78	4.4	4.14	9.68	4.54	4.46	3.76	3.96	4.36	4.5	3.6	4.2	3.6
100	3.77	2.95	4.33	6.25		6.7	8.17	8.82	7.48	10.8	8.58	8.58	8.98	7.98	8.7	9.6	7.7	8.6	6.8
250	8.89	7.4	10.5	13.1		11.2	18.1	16	17.4	20.1	17.6	18.3	14.7	18.9	8.8	16.3	15.6	18	13.7
500	38.7	27.1	29.6	38.8		36.6	40.3	56.3	55.8	59	49.5	47.7	43.4	42.6	58	40.6	58.1	45	53.6
1000	67.8	44.9	55	63.4		77.7	78.7	91.6	95.7	93	88.1	90	93	94.8	103	87.2	95.3	92.5	103
2000	120	86.7	103	102		117	131	147.6	160	147	149	153	137.4	139	125	146	144	150	139
3500		128		143		115	161	183.1	206	195	179	208	183	179	174	186	209	205	184
Date	Sample Name	vmax	Lag Time	Corrected Vmax		ng/ml APC		fmols/ml	pmol/ml	pmol/ml/cm2	pM/cm2	nM/cm2	(EXP + H) - (MM +H)	(EXP - H) - (MM - H)
2013-03-04	SEV CREB 908 +R	60.8		60.8		979.502		16601.7	16.6017	296.46	296460	296.46	-167.274
24wk F	Sev CREB 908 -R	122		122		1971.4		33413.5	33.4135	596.67	596670	596.67		-313.946
	MM Con +R	94.9		94.9		1532.18		25969.1	25.9691	463.734	463734	463.734
	MM Con -R	186		186		3008.68		50994.5	50.9945	910.616	910616	910.616
2013-03-06	SEV CREB 938 +R	76.1		76.1		1951		33067.8	33.0678	590.496	590496	590.496	69.8454
24wk F	Sev CREB 938 -R	154.9	450s	154.9		4041.19		68494.7	68.4947	1223.12	1.22312e+06	1223.12		-233.621
	LM WT 936 +R	103.5	1000s	103.5		2677.79		45386.3	45.3863	810.469	810469	810.469	289.818
	LM WT 936 -R	135	509s	135		3513.33		59548	59.548	1063.36	1.06336e+06	1063.36		-393.382
	MM Con +R	67.4		67.4		1720.23		29156.5	29.1565	520.651	520651	520.651
	MM Con -R	184		184		4813.07		81577.4	81.5774	1456.74	1.45674e+06	1456.74
2013-04-11	SEV CREB 971 +H	74.84		74.84		1428.23		24207.3	24.2073	432.273	432273	432.273	339.283
12wk F	SEV CREB 971 -H	124.96		124.96		2384.72		40418.9	40.4189	721.767	721767	721.767		-341.016
	LM WT 968 +H	30.25		30.25		577.275		9784.32	9.78432	174.72	174720	174.72	81.7307
	LM WT 968 -H	48.69		48.69		929.183		15748.9	15.7489	281.23	281230	281.23		-781.553
	MM Con +R	16.1		16.1		307.237		5207.4	5.2074	92.9893	92989.3	92.9893
	MM Con -R	184		184		3511.44		59515.8	59.5158	1062.78	1.06278e+06	1062.78
2013-05-17	SC 972 +H	24.8		24.8		435.05		7373.72	7.37372	131.674	131674	131.674	93.7326
16wk F	SC 973 -H	0.09		0.09		-149.111		-2527.31	-2.52731	-45.1305	-45130.5	-45.1305		-1079.79
	LM WT 978 +H	29.9		29.9		555.617		9417.24	9.41724	168.165	168165	168.165	130.224
	LM WT 978 -H	39.9		39.9		792.024		13424.1	13.4241	239.717	239717	239.717		-794.939
	MM Con +H	11.7		11.7		125.357		2124.69	2.12469	37.941	37941	37.941
	MM Con -H	151		151		3418.5		57940.7	57.9407	1034.66	1.03466e+06	1034.66
2013-07-12	Sev CREB 7 +H	48.9		48.9		767.711		13012	13.012	232.358	232358	232.358	161.223
20wk F	Sev CREB 7 -H	38.6		38.6		599.41		10159.5	10.1595	181.42	181420	181.42		-590.49
	WT 9 +H	26.5		26.5		401.698		6808.44	6.80844	121.579	121579	121.579	50.4439
	WT 9 -H	49.2		49.2		772.613		13095.1	13.0951	233.842	233842	233.842		-538.068
	MM Con +H	16.3		16.3		235.031		3983.58	3.98358	71.1353	71135.3	71.1353
	MM Con -H	158		158		2550.39		43227	43.227	771.91	771910	771.91
2013-10-04	SEV CREB 998 +H	49.4		49.4		701.487		11889.6	11.8896	212.315	212315	212.315	218.315
32wk F	SEV CREB 998 - H	33.8		33.8		468.999		7949.13	7.94913	141.949	141949	141.949		-492.561
	LM WT 10 +H	19.2		19.2		251.413		4261.23	4.26123	76.0935	76093.5	76.0935	82.0935
	LM WT 10 -H	28.2		28.2		385.541		6534.59	6.53459	116.689	116689	116.689		-517.821
	MM Con +H	1		1		-19.8241		-336.002	-0.336002	-6.00004	-6000.04	-6.00004
	MM Con -H	143		143		2096.42		35532.5	35.5325	634.51	634510	634.51
								0	0	0	0	0
2014-03-11	Sev Creb 24 +H	29.3		29.3		329.835		5590.42	5.59042	99.829	99829	99.829	-18.7915
46wk M	Sev Creb 24 -H	40.1		40.1		472.503		8008.53	8.00853	143.009	143009	143.009		-835.223
	LM WT 15 +H	25.1		25.1		274.353		4650.05	4.65005	83.0365	83036.5	83.0365	-35.5839
	LM WT 15 -H	41.2		41.2		487.034		8254.82	8.25482	147.407	147407	147.407		-830.825
	MM Con +H	34		34		391.922		6642.75	6.64275	118.62	118620	118.62
	MM Con - H	249		249		3232.08		54781	54.781	978.233	978233	978.233
								0	0	0	0	0
2014-03-13	Mild Creb 166 +H	11.7		11.7		106.654		1807.7	1.8077	32.2803	32280.3	32.2803	-149.304
16 wk M	Mild Creb 166 -H	23.7		23.7		252.817		4285.04	4.28504	76.5186	76518.6	76.5186		-849.006
	LM WT 165 +H	29.1		29.1		318.591		5399.84	5.39984	96.4258	96425.8	96.4258	-85.1587
	LM WT 165 -H	27.9		27.9		303.974		5152.11	5.15211	92.0019	92001.9	92.0019		-833.523
	MM Con +H	52.2		52.2		599.955		10168.7	10.1687	181.584	181584	181.584
	MM Con -H	254		254		3057.93		51829.4	51.8294	925.525	925525	925.525
								0	0	0	0	0
2014-03-13	Mild Creb 168 +H	9.76		9.76		-144.801		-2454.26	-2.45426	-43.8261	-43826.1	-43.8261	-171.764
16 wk M	Mild Creb 168 -H	24.9		24.9		128.484		2177.69	2.17769	38.8873	38887.3	38.8873		-945.687
	LM WT 167 +H	16.1		16.1		-30.361		-514.593	-0.514593	-9.18917	-9189.17	-9.18917	-137.127
	LM WT 167 -H	39.3		39.3		388.412		6583.25	6.58325	117.558	117558	117.558		-867.016
	MM Con +H	41.2		41.2		422.708		7164.54	7.16454	127.938	127938	127.938
	MM Con -H	198		198		3253.03		55136.1	55.1361	984.574	984574	984.574
								0	0	0	0	0
2014-03-24	Sev Creb 143 +H	-184		-184		-2449.93		-41524.3	-41.5243	-741.505	-741505	-741.505	-15.8878
20wk F	Sev Creb 143 -H	-184		-184		-2449.93		-41524.3	-41.5243	-741.505	-741505	-741.505		-808.691
	MM Con +H	-180		-180		-2397.44		-40634.6	-40.6346	-725.617	-725617	-725.617
	MM Con -H	19.6		19.6		221.983		3762.42	3.76242	67.1861	67186.1	67.1861
								0	0	0	0	0
	LM WT 144 +H	28.3		28.6		338.774		5741.94	5.74194	102.535	102535	102.535	-42.4655
	LM WT 144 -H	26		26		305.611		5179.85	5.17985	92.4973	92497.3	92.4973		-725.775
	MM Con +H	39.6		39.6		479.08		8120.01	8.12001	145	145000	145
	MM Con -H	214		214		2703.57		45823.2	45.8232	818.272	818272	818.272
								0	0	0	0	0
	30 minute incubations							0	0	0	0	0
2014-03-25	Mild Creb 177 +H	26.3		26.3		23.4625		397.669	0.397669	7.10124	7101.24	7.10124	-2.39104
12 wk F	Mild Creb 177 -H	69.2		69.2		66.3625		1124.79	1.12479	20.0855	20085.5	20.0855		-46.5496
	MM Con +H	34.2		34.2		31.3625		531.568	0.531568	9.49228	9492.28	9.49228
	MM Con -H	223		223		220.162		3731.57	3.73157	66.6351	66635.1	66.6351
								0	0	0	0	0
	LM WT 176 +H	26.4		26.4		23.5625		399.364	0.399364	7.13151	7131.51	7.13151	-0.363196
	LM WT 176 -H	191		191		188.162		3189.19	3.18919	56.9499	56949.9	56.9499		-12.4092
	MM Con +H	27.6		27.6		24.7625		419.703	0.419703	7.4947	7494.7	7.4947
	MM Con -H	232		232		229.162		3884.11	3.88411	69.3591	69359.1	69.3591
								0	0	0	0	0
	60 min incubation							0	0	0	0	0
	WT 176 +H	16.4		16.4		13.5625		229.873	0.229873	4.10487	4104.87	4.10487	-2.02785
	WT 176 -H	40.8		40.8		37.9625		643.432	0.643432	11.4899	11489.9	11.4899		-59.0799
	MM Con +H	23.1		23.1		20.2625		343.432	0.343432	6.13272	6132.72	6.13272
	Mm Con -H	236		236		233.162		3951.91	3.95191	70.5698	70569.8	70.5698
								0	0	0	0	0
2014-03-26	30min incubation							0	0	0	0	0
12 wk M	Mild Creb 182 +H	11.1		11.1		112.397		1905.04	1.90504	34.0185	34018.5	34.0185	-8.70676
	Mild Creb 182 -H	26.7		26.7		326.096		5527.05	5.52705	98.6973	98697.3	98.6973		-585.84
	MM Con +H	13.2		13.2		141.164		2392.62	2.39262	42.7253	42725.3	42.7253
	MM Con -H	168		168		2261.71		38334.1	38.3341	684.538	684538	684.538
								0	0	0	0	0
	LM WT 183 +H	19.3		19.3		207.916		3524	3.524	62.9286	62928.6	62.9286	17.9715
	LM WT 183 -H	63.7		63.7		626.389		10616.8	10.6168	189.585	189585	189.585		-443.013
	MM Con +H	13		13		148.538		2517.6	2.5176	44.9571	44957.1	44.9571
	MM Con -H	219		219		2090.1		35425.5	35.4255	632.598	632598	632.598
								0	0	0	0	0
2014-03-27	30 min inc							0	0	0	0	0
33 wk M	Res Creb 73 +H	21.8		21.8		267.393		4532.08	4.53208	80.93	80930	80.93	-5.2743
	Res Creb 73 -H	42.6		42.6		546.213		9257.85	9.25785	165.319	165319	165.319		-666.996
	MM Con +H	23.1		23.1		284.819		4827.44	4.82744	86.2043	86204.3	86.2043
	MM Con -H	207		207		2749.97		46609.6	46.6096	832.314	832314	832.314
								0	0	0	0	0
	LM WT 80 +H	15.5		15.5		85.6557		1451.79	1.45179	25.9249	25924.9	25.9249	-50.6093
	LM WT 80 -H	53.5		53.5		708.607		12010.3	12.0103	214.469	214469	214.469		-751.697
	Mm Con +H	25.7		25.7		252.869		4285.91	4.28591	76.5342	76534.2	76.5342
	MM Con -H	205		205		3192.21		54105.3	54.1053	966.166	966166	966.166
								0	0	0	0	0
45 wk M	Res Creb 22 +H	13.4		13.4		154.792		2623.6	2.6236	46.8499	46849.9	46.8499	-36.5144
	Res Creb 22 -H	37.1		37.1		472.487		8008.25	8.00825	143.004	143004	143.004		-681.196
	MM Con +H	22.4		22.4		275.436		4668.4	4.6684	83.3643	83364.3	83.3643
	MM Con -H	205		205		2723.16		46155.2	46.1552	824.2	824200	824.2
								0	0	0	0	0
2014-03-28	Sev Creb 192 +H	78.3		78.3		3790.91		64252.6	64.2526	1147.37	1.14737e+06	1147.37	851.998
8 wk F	Sev Creb 192 -H	167		167		8225.91		139422	139.422	2489.68	2.48968e+06	2489.68		-1815.98
	MM Con +H	22		22		975.905		16540.8	16.5408	295.371	295371	295.371
	Mm Con -H	287		287		14225.9		241117	241.117	4305.66	4.30566e+06	4305.66
								0	0	0	0	0
2014-04-24	Sev Creb 142 +H	0.38		0.38		39.1818		664.099	0.664099	11.8589	11858.9	11.8589	-62.1779
20 wk F	Sev Creb 142 -H	68.2		68.2		674.796		11437.2	11.4372	204.236	204236	204.236		-527.037
	Res Creb 95 +H	15.5		15.5		180.888		3065.89	3.06589	54.748	54748	54.748	-19.2888
31wk F	Res Creb 95 -H	44.5		44.5		452.678		7672.5	7.6725	137.009	137009	137.009		-594.264
	MM Con +H	22.3		22.3		244.618		4146.06	4.14606	74.0368	74036.8	74.0368
	MM Con -H	254		254		2416.13		40951.3	40.9513	731.273	731273	731.273

## Sheet: Vmax calc B4 convert
Date	Sample Name	vmax	(Exp +H) - (MM Con +H)	ng/ml APC		fmols/ml	pmol/ml	pmol/ml/cm2	pM/cm2	nM/cm2
2013-03-04	SEV CREB 908 +R	60.8	-34.1	-558.585		-9467.54	-9.46754	-169.063	-169063	-169.063
24wk F	Sev CREB 908 -R	122		1971.4		33413.5	33.4135	596.67	596670	596.67
	MM Con +R	94.9		1532.18		25969.1	25.9691	463.734	463734	463.734
	MM Con -R	186		3008.68		50994.5	50.9945	910.616	910616	910.616
2013-03-06	SEV CREB 938 +R	76.1	8.7	163.202		2766.13	2.76613	590.496	590496	590.496
24wk F	Sev CREB 938 -R	154.9		4041.19		68494.7	68.4947	1223.12	1.22312e+06	1223.12
	LM WT 936 +R	103.5	36.1	889.992		15084.6	15.0846	810.469	810469	810.469
	LM WT 936 -R	135		3513.33		59548	59.548	1063.36	1.06336e+06	1063.36
	MM Con +R	67.4		1720.23		29156.5	29.1565	520.651	520651	520.651
	MM Con -R	184		4813.07		81577.4	81.5774	1456.74	1.45674e+06	1456.74
2013-04-11	SEV CREB 971 +H	74.84	58.74	1120.98		18999.6	18.9996	339.279	339279	339.279
12wk F	SEV CREB 971 -H	124.96		2384.72		40418.9	40.4189	721.767	721767	721.767
	LM WT 968 +H	30.25	14.15	270.023		4576.66	4.57666	81.7261	81726.1	81.7261
	LM WT 968 -H	48.69		929.183		15748.9	15.7489	281.23	281230	281.23
	MM Con +R	16.1		307.237		5207.4	5.2074	92.9893	92989.3	92.9893
	MM Con -R	184		3511.44		59515.8	59.5158	1062.78	1.06278e+06	1062.78
2013-05-17	SC 972 +H	24.8	13.1	158.454		2685.66	2.68566	47.9582	47958.2	47.9582
16wk F	SC 973 -H	0.09		-149.111		-2527.31	-2.52731	-45.1305	-45130.5	-45.1305
	LM WT 978 +H	29.9	18.2	279.021		4729.17	4.72917	84.4495	84449.5	84.4495
	LM WT 978 -H	39.9		792.024		13424.1	13.4241	239.717	239717	239.717
	MM Con +H	11.7		125.357		2124.69	2.12469	37.941	37941	37.941
	MM Con -H	151		3418.5		57940.7	57.9407	1034.66	1.03466e+06	1034.66
2013-07-12	Sev CREB 7 +H	48.9	32.6	501.371		8497.81	8.49781	151.747	151747	151.747
20wk F	Sev CREB 7 -H	38.6		599.41		10159.5	10.1595	181.42	181420	181.42
	WT 9 +H	26.5	10.2	135.358		2294.2	2.2942	40.9679	40967.9	40.9679
	WT 9 -H	49.2		772.613		13095.1	13.0951	233.842	233842	233.842
	MM Con +H	16.3		235.031		3983.58	3.98358	71.1353	71135.3	71.1353
	MM Con -H	158		2550.39		43227	43.227	771.91	771910	771.91
2013-10-04	SEV CREB 998 +H	49.4	48.4	686.584		11637	11.637	207.804	207804	207.804
32wk F	SEV CREB 998 - H	33.8		468.999		7949.13	7.94913	141.949	141949	141.949
	LM WT 10 +H	19.2	18.2	236.51		4008.64	4.00864	71.5828	71582.8	71.5828
	LM WT 10 -H	28.2		385.541		6534.59	6.53459	116.689	116689	116.689
	MM Con +H	1		-19.8241		-336.002	-0.336002	-6.00004	-6000.04	-6.00004
	MM Con -H	143		2096.42		35532.5	35.5325	634.51	634510	634.51
						0	0	0	0	0
2014-03-11	Sev Creb 24 +H	29.3	-4.7	-119.306		-2022.14	-2.02214	-36.1097	-36109.7	-36.1097
46wk M	Sev Creb 24 -H	40.1		472.503		8008.53	8.00853	143.009	143009	143.009
	LM WT 15 +H	25.1	-8.9	-174.789		-2962.52	-2.96252	-52.9021	-52902.1	-52.9021
	LM WT 15 -H	41.2		487.034		8254.82	8.25482	147.407	147407	147.407
	MM Con +H	34		391.922		6642.75	6.64275	118.62	118620	118.62
	MM Con - H	249		3232.08		54781	54.781	978.233	978233	978.233
						0	0	0	0	0
2014-03-13	Mild Creb 166 +H	11.7	-40.5	-529.156		-8968.74	-8.96874	-160.156	-160156	-160.156
16 wk M	Mild Creb 166 -H	23.7		252.817		4285.04	4.28504	76.5186	76518.6	76.5186
	LM WT 165 +H	29.1	-23.1	-317.219		-5376.6	-5.3766	-96.0107	-96010.7	-96.0107
	LM WT 165 -H	27.9		303.974		5152.11	5.15211	92.0019	92001.9	92.0019
	MM Con +H	52.2		599.955		10168.7	10.1687	181.584	181584	181.584
	MM Con -H	254		3057.93		51829.4	51.8294	925.525	925525	925.525
						0	0	0	0	0
2014-03-13	Mild Creb 168 +H	9.76	-31.44	-888.484		-15059	-15.059	-268.912	-268912	-268.912
16 wk M	Mild Creb 168 -H	24.9		128.484		2177.69	2.17769	38.8873	38887.3	38.8873
	LM WT 167 +H	16.1	-25.1	-774.043		-13119.4	-13.1194	-234.275	-234275	-234.275
	LM WT 167 -H	39.3		388.412		6583.25	6.58325	117.558	117558	117.558
	MM Con +H	41.2		422.708		7164.54	7.16454	127.938	127938	127.938
	MM Con -H	198		3253.03		55136.1	55.1361	984.574	984574	984.574
						0	0	0	0	0
2014-03-24	Sev Creb 143 +H	-184	-4	-87.7283		-1486.92	-1.48692	-26.5522	-26552.2	-26.5522
20wk F	Sev Creb 143 -H	-184		-2449.93		-41524.3	-41.5243	-741.505	-741505	-741.505
	MM Con +H	-180		-2397.44		-40634.6	-40.6346	-725.617	-725617	-725.617
	MM Con -H	19.6		221.983		3762.42	3.76242	67.1861	67186.1	67.1861
						0	0	0	0	0
	LM WT 144 +H	28.3	-11.3	-170.154		-2883.97	-2.88397	-51.4995	-51499.5	-51.4995
	LM WT 144 -H	26		305.611		5179.85	5.17985	92.4973	92497.3	92.4973
	MM Con +H	39.6		479.08		8120.01	8.12001	145	145000	145
	MM Con -H	214		2703.57		45823.2	45.8232	818.272	818272	818.272
						0	0	0	0	0
	30 minute incubations					0	0	0	0	0
2014-03-25	Mild Creb 177 +H	26.3	-7.9	-10.7375		-181.992	-0.181992	-3.24985	-3249.85	-3.24985
12 wk F	Mild Creb 177 -H	69.2		66.3625		1124.79	1.12479	20.0855	20085.5	20.0855
	MM Con +H	34.2		31.3625		531.568	0.531568	9.49228	9492.28	9.49228
	MM Con -H	223		220.162		3731.57	3.73157	66.6351	66635.1	66.6351
						0	0	0	0	0
	LM WT 176 +H	26.4	-1.2	-4.0375		-68.4322	-0.0684322	-1.222	-1222	-1.222
	LM WT 176 -H	191		188.162		3189.19	3.18919	56.9499	56949.9	56.9499
	MM Con +H	27.6		24.7625		419.703	0.419703	7.4947	7494.7	7.4947
	MM Con -H	232		229.162		3884.11	3.88411	69.3591	69359.1	69.3591
						0	0	0	0	0
	60 min incubation					0	0	0	0	0
	WT 176 +H	16.4	-6.7	-9.5375		-161.653	-0.161653	-2.88665	-2886.65	-2.88665
	WT 176 -H	40.8		37.9625		643.432	0.643432	11.4899	11489.9	11.4899
	MM Con +H	23.1		20.2625		343.432	0.343432	6.13272	6132.72	6.13272
	Mm Con -H	236		233.162		3951.91	3.95191	70.5698	70569.8	70.5698
						0	0	0	0	0
2014-03-26	30min incubation					0	0	0	0	0
12 wk M	Mild Creb 182 +H	11.1	-2.1	-68.4247		-1159.74	-1.15974	-20.7096	-20709.6	-20.7096
	Mild Creb 182 -H	26.7		326.096		5527.05	5.52705	98.6973	98697.3	98.6973
	MM Con +H	13.2		141.164		2392.62	2.39262	42.7253	42725.3	42.7253
	MM Con -H	168		2261.71		38334.1	38.3341	684.538	684538	684.538
						0	0	0	0	0
	LM WT 183 +H	19.3	6.3	85.3902		1447.29	1.44729	25.8445	25844.5	25.8445
	LM WT 183 -H	63.7		626.389		10616.8	10.6168	189.585	189585	189.585
	MM Con +H	13		148.538		2517.6	2.5176	44.9571	44957.1	44.9571
	MM Con -H	219		2090.1		35425.5	35.4255	632.598	632598	632.598
						0	0	0	0	0
2014-03-27	30 min inc					0	0	0	0	0
33 wk M	Res Creb 73 +H	21.8	-1.3	-42.2587		-716.249	-0.716249	-12.7902	-12790.2	-12.7902
	Res Creb 73 -H	42.6		546.213		9257.85	9.25785	165.319	165319	165.319
	MM Con +H	23.1		284.819		4827.44	4.82744	86.2043	86204.3	86.2043
	MM Con -H	207		2749.97		46609.6	46.6096	832.314	832314	832.314
						0	0	0	0	0
	LM WT 80 +H	15.5	-10.2	-335.656		-5689.08	-5.68908	-101.591	-101591	-101.591
	LM WT 80 -H	53.5		708.607		12010.3	12.0103	214.469	214469	214.469
	Mm Con +H	25.7		252.869		4285.91	4.28591	76.5342	76534.2	76.5342
	MM Con -H	205		3192.21		54105.3	54.1053	966.166	966166	966.166
						0	0	0	0	0
45 wk M	Res Creb 22 +H	13.4	-9	-145.476		-2465.69	-2.46569	-44.0302	-44030.2	-44.0302
	Res Creb 22 -H	37.1		472.487		8008.25	8.00825	143.004	143004	143.004
	MM Con +H	22.4		275.436		4668.4	4.6684	83.3643	83364.3	83.3643
	MM Con -H	205		2723.16		46155.2	46.1552	824.2	824200	824.2
						0	0	0	0	0
2014-03-28	Sev Creb 192 +H	78.3	56.3	2690.9		45608.6	45.6086	814.439	814439	814.439
8 wk F	Sev Creb 192 -H	167		8225.91		139422	139.422	2489.68	2.48968e+06	2489.68
	MM Con +H	22		975.905		16540.8	16.5408	295.371	295371	295.371
	Mm Con -H	287		14225.9		241117	241.117	4305.66	4.30566e+06	4305.66
						0	0	0	0	0
2014-04-24	Sev Creb 142 +H	0.38	-21.92	-169.815		-2878.23	-2.87823	-51.3969	-51396.9	-51.3969
20 wk F	Sev Creb 142 -H	68.2		674.796		11437.2	11.4372	204.236	204236	204.236
	Res Creb 95 +H	15.5	-6.8	-28.1097		-476.435	-0.476435	-8.50776	-8507.76	-8.50776
31wk F	Res Creb 95 -H	44.5		452.678		7672.5	7.6725	137.009	137009	137.009
	MM Con +H	22.3		244.618		4146.06	4.14606	74.0368	74036.8	74.0368
	MM Con -H	254		2416.13		40951.3	40.9513	731.273	731273	731.273

## Sheet: 8 Min OD
	SC Concentrations
		2013-03-04	2013-03-06	2013-04-11	2013-05-17	2013-07-12	2013-10-04	2014-03-11	3/13/14 MC 166	3/13/14 MC 168	3/24/14 CR	3/24/14 WT	2014-03-25	3/26/14 MC 182	3/26/14 WT	3/27/14 Crebs	3/27/14 Wt	2014-03-28	2014-04-24
	0			0	0	0	0	0.11	0.15	0.13	0.15	0.15	0.12	0.12	0.12	0.12	0.14	0.12	0.15
	25			0.01	0.02	0.01	-0.01	0.14	0.13	0.18	0.15	0.2	0.13	0.13	0.14	0.14	0.16	0.14	0.18
	50			0.01	0.03	0.03	-0.007	0.17	0.15	0.18	0.2	0.25	0.14	0.15	0.16	0.16	0.21	0.15	0.21
	100			0.03	0.05	0.05	0.05	0.2	0.17	0.22	0.2	0.25	0.19	0.19	0.2	0.19	0.23	0.2	0.23
	250			0.1	0.1	0.06	0.12	0.26	0.26	0.33	0.28	0.32	0.25	0.27	0.2	0.27	0.31	0.27	0.34
	500	0.29	0.15	0.22	0.28	0.27	0.29	0.55	0.56	0.63	0.51	0.58	0.46	0.45	0.58	0.45	0.56	0.47	0.57
	1000	0.48	0.27	0.4	0.44	0.52	0.52	0.78	0.75	0.77	0.74	0.82	0.74	0.78	0.83	0.71	0.81	0.73	0.83
	2000	0.72	0.55	0.65	0.63	0.68	0.72	1.02	0.98	1.02	0.97	1.03	0.89	0.95	0.87	0.94	0.95	0.93	0.92
	3500	0.79	0.73	0.79	0.77	0.71	0.77	1.06	1.07	1.1	1.03	1.14	1	1.01	1	1.1	1.1	1.1	1
Date	Sample Name	8 Min OD		ng/ml APC		fmols/ml	pmol/ml	pmol/ml/cm2	pM/cm2	nM/cm2	(EXP + H) - (MM +H)	(EXP - H) - (MM - H)
2013-03-04	SEV CREB 908 +R	0.41		600		10169.5	10.1695	181.598	181598	181.598	-282.136
24wk F	Sev CREB 908 -R	0.7		2050		34745.8	34.7458	596.67	596670	596.67		-313.946
	MM Con +R	0.6		1550		26271.2	26.2712	463.734	463734	463.734
	MM Con -R	0.77		2400		40678	40.678	910.616	910616	910.616
2013-03-06	SEV CREB 938 +R	0.52		2183.5		37008.5	37.0085	590.496	590496	590.496	69.8454
24wk F	Sev CREB 938 -R	0.54		2283.5		38703.4	38.7034	1223.12	1.22312e+06	1223.12		-233.621
	LM WT 936 +R	0.62		2683.5		45483.1	45.4831	810.469	810469	810.469	289.818
	LM WT 936 -R	0.48		1983.5		33618.6	33.6186	1063.36	1.06336e+06	1063.36		-393.382
	MM Con +R	0.35		1333.5		22601.7	22.6017	520.651	520651	520.651
	MM Con -R	0.5		2083.5		35313.6	35.3136	1456.74	1.45674e+06	1456.74
2013-04-11	SEV CREB 971 +H	0.67		2166		36711.9	36.7119	655.569	655569	655.569	544.794
12wk F	SEV CREB 971 -H	0.55		1766		29932.2	29.9322	534.504	534504	534.504		-252.22
	LM WT 968 +H	0.23		699.333		11853.1	11.8531	211.663	211663	211.663	100.888
	LM WT 968 -H	0.35		1099.33		18632.8	18.6328	332.728	332728	332.728		-453.995
	MM Con +R	0.13		366		6203.39	6.20339	110.775	110775	110.775
	MM Con -R	0.8		2599.33		44056.5	44.0565	786.723	786723	786.723
2013-05-17	SC 972 +H	0.19		464.333		7870.06	7.87006	140.537	140537	140.537	100.888
16wk F	SC 973 -H			-169		-2864.41	-2.86441	-51.1501	-51150.1	-51.1501		-756.659
	LM WT 978 +H	0.23		597.667		10129.9	10.1299	180.892	180892	180.892	141.243
	LM WT 978 -H	0.29		797.667		13519.8	13.5198	241.425	241425	241.425		-464.084
	MM Con +H	0.09		131		2220.34	2.22034	39.6489	39648.9	39.6489
	MM Con -H	0.75		2331		39508.5	39.5085	705.508	705508	705.508
2013-07-12	Sev CREB 7 +H	0.34		706.6		11976.3	11.9763	213.862	213862	213.862	127.119
20wk F	Sev CREB 7 -H	0.28		586.6		9942.37	9.94237	177.542	177542	177.542		-242.131
	WT 9 +H	0.2		426.6		7230.51	7.23051	129.116	129116	129.116	42.3729
	WT 9 -H	0.35		726.6		12315.3	12.3153	219.915	219915	219.915		-199.758
	MM Con +H	0.13		286.6		4857.63	4.85763	86.7433	86743.3	86.7433
	MM Con -H	0.68		1386.6		23501.7	23.5017	419.673	419673	419.673
2013-10-04	SEV CREB 998 +H	0.31		618.8		10488.1	10.4881	187.288	187288	187.288	266.344
32wk F	SEV CREB 998 - H	0.22		438.8		7437.29	7.43729	132.809	132809	132.809		-205.811
	LM WT 10 +H	0.13		258.8		4386.44	4.38644	78.3293	78329.3	78.3293	157.385
	LM WT 10 -H	0.19		378.8		6420.34	6.42034	114.649	114649	114.649		-223.971
	MM Con +H	-0.13		-261.2		-4427.12	-4.42712	-79.0557	-79055.7	-79.0557
	MM Con -H	0.56		1118.8		18962.7	18.9627	338.62	338620	338.62
						0	0	0	0	0
2014-03-11	Sev Creb 24 +H	0.81		974.714		16520.6	16.5206	295.01	295010	295.01	229.159
46wk M	Sev Creb 24 -H	0.88		1074.71		18215.5	18.2155	325.277	325277	325.277		-90.799
	LM WT 15 +H	1.33		1717.57		29111.4	29.1114	519.846	519846	519.846	453.995
	LM WT 15 -H	1.36		1760.43		29837.8	29.8378	532.817	532817	532.817		116.742
	MM Con +H	0.28		217.571		3687.65	3.68765	65.8509	65850.9	65.8509
	MM Con - H	1.09		1374.71		23300.2	23.3002	416.076	416076	416.076
						0	0	0	0	0
2014-03-13	Mild Creb 166 +H	0.87		1732		29355.9	29.3559	524.213	524213	524.213	348.063
16 wk M	Mild Creb 166 -H	0.89		1782		30203.4	30.2034	539.346	539346	539.346		-158.898
	LM WT 165 +H	1.6		3557		60288.1	60.2881	1076.57	1.07657e+06	1076.57	900.424
	LM WT 165 -H	1.7		3807		64525.4	64.5254	1152.24	1.15224e+06	1152.24		453.995
	MM Con +H	0.41		582		9864.41	9.86441	176.15	176150	176.15
	MM Con -H	1.1		2307		39101.7	39.1017	698.245	698245	698.245
						0	0	0	0	0
2014-03-13	Mild Creb 168 +H	0.96		1136		19254.2	19.2542	343.826	343826	343.826	250.778
16 wk M	Mild Creb 168 -H	1.2		1478.86		25065.4	25.0654	447.596	447596	447.596		108.094
	LM WT 167 +H	1.2		1478.86		25065.4	25.0654	447.596	447596	447.596	354.549
	LM WT 167 -H	1		1193.14		20222.8	20.2228	361.121	361121	361.121		21.6188
	MM Con +H	0.38		307.429		5210.65	5.21065	93.0474	93047.4	93.0474
	MM Con -H	0.95		1121.71		19012.1	19.0121	339.502	339502	339.502
						0	0	0	0	0
2014-03-24	Sev Creb 143 +H	0.04		-185.333		-3141.24	-3.14124	-56.0936	-56093.6	-56.0936	171.509
20wk F	Sev Creb 143 -H	0.04		-185.333		-3141.24	-3.14124	-56.0936	-56093.6	-56.0936		-30.2663
	MM Con +H	-0.3		-752		-12745.8	-12.7458	-227.603	-227603	-227.603
	MM Con -H	0.1		-85.3333		-1446.33	-1.44633	-25.8273	-25827.3	-25.8273
						0	0	0	0	0
	LM WT 144 +H	1.5		1877.71		31825.7	31.8257	568.315	568315	568.315	497.233
	LM WT 144 -H	1.5		1877.71		31825.7	31.8257	568.315	568315	568.315		198.893
	MM Con +H	0.35		234.857		3980.63	3.98063	71.0827	71082.7	71.0827
	MM Con -H	1.04		1220.57		20687.7	20.6877	369.422	369422	369.422
						0	0	0	0	0
	30 minute incubations					0	0	0	0	0
2014-03-25	Mild Creb 177 +H	0.51		870.75		14758.5	14.7585	263.544	263544	263.544	174.031
12 wk F	Mild Creb 177 -H	0.88		1795.75		30436.4	30.4364	543.508	543508	543.508		-90.799
	MM Con +H	0.28		295.75		5012.71	5.01271	89.5127	89512.7	89.5127
	MM Con -H	1		2095.75		35521.2	35.5212	634.307	634307	634.307
	LM WT 176 +H	0.31		370.75		6283.9	6.2839	112.212	112212	112.212	30.2663
	LM WT 176 -H	1.02		2145.75		36368.6	36.3686	649.44	649440	649.44		-7.56659
	MM Con +H	0.27		270.75		4588.98	4.58898	81.9461	81946.1	81.9461
	MM Con -H	1.03		2170.75		36792.4	36.7924	657.007	657007	657.007
	60 min incubation
	WT 176 +H	0.99		2070.75		35097.5	35.0975	626.74	626740	626.74	605.327
	WT 176 -H	0.83		1670.75		28317.8	28.3178	505.675	505675	505.675		-128.632
	MM Con +H	0.19		70.75		1199.15	1.19915	21.4134	21413.4	21.4134
	Mm Con -H	1		2095.75		35521.2	35.5212	634.307	634307	634.307
						0	0	0	0	0
2014-03-26	30min incubation					0	0	0	0	0
12 wk M	Mild Creb 182 +H	0.69		1320		22372.9	22.3729	399.516	399516	399.516	438.862
	Mild Creb 182 -H	0.69		1320		22372.9	22.3729	399.516	399516	399.516		-189.165
	MM Con +H	0.11		-130		-2203.39	-2.20339	-39.3462	-39346.2	-39.3462
	MM Con -H	0.94		1945		32966.1	32.9661	588.68	588680	588.68
						0	0	0	0	0
	LM WT 183 +H	0.71		849.429		14397.1	14.3971	257.091	257091	257.091	263.75
	LM WT 183 -H	1.13		1449.43		24566.6	24.5666	438.689	438689	438.689		56.2089
	MM Con +H	0.1		-22		-372.881	-0.372881	-6.6586	-6658.6	-6.6586
	MM Con -H	1		1263.71		21418.9	21.4189	382.48	382480	382.48
						0	0	0	0	0
2014-03-27	30 min inc					0	0	0	0	0
33 wk M	Res Creb 73 +H	0.37		402.667		6824.86	6.82486	121.872	121872	121.872	110.977
	Res Creb 73 -H	0.65		869.333		14734.5	14.7345	263.115	263115	263.115		-126.11
	MM Con +H	0.15		36		610.169	0.610169	10.8959	10895.9	10.8959
	MM Con -H	0.9		1286		21796.6	21.7966	389.225	389225	389.225
						0	0	0	0	0
	LM WT 80 +H	0.62		658		11152.5	11.1525	199.153	199153	199.153	198.893
	LM WT 80 -H	0.69		758		12847.5	12.8475	229.419	229419	229.419		-73.504
	Mm Con +H	0.16		0.857143		14.5278	0.0145278	0.259426	259.426	0.259426
	MM Con -H	0.86		1000.86		16963.7	16.9637	302.923	302923	302.923
45 wk M	Res Creb 22 +H	0.53		669.333		11344.6	11.3446	202.583	202583	202.583	191.687
	Res Creb 22 -H	0.59		769.333		13039.5	13.0395	232.849	232849	232.849		-176.554
	MM Con +H	0.15		36		610.169	0.610169	10.8959	10895.9	10.8959
	MM Con -H	0.94		1352.67		22926.6	22.9266	409.403	409403	409.403
						0	0	0	0	0
2014-03-28	Sev Creb 192 +H	0.74		1021		17305.1	17.3051	309.019	309019	309.019	282.486
8 wk F	Sev Creb 192 -H	1.01		1471		24932.2	24.9322	445.218	445218	445.218		10.0888
	MM Con +H	0.18		87.6667		1485.88	1.48588	26.5335	26533.5	26.5335
	Mm Con -H	0.99		1437.67		24367.2	24.3672	435.129	435129	435.129
						0	0	0	0	0
2014-04-24	Sev Creb 142 +H	0.31		200.857		3404.36	3.40436	60.7921	60792.1	60.7921	51.8852
20 wk F	Sev Creb 142 -H	0.86		986.571		16721.5	16.7215	298.599	298599	298.599		-25.9426
	Res Creb 95 +H	0.36		272.286		4615.01	4.61501	82.4109	82410.9	82.4109	73.504
31wk F	Res Creb 95 -H	0.6		615.143		10426.2	10.4262	186.181	186181	186.181		-138.36
	MM Con +H	0.19		29.4286		498.789	0.498789	8.90695	8906.95	8.90695
	MM Con -H	0.92		1072.29		18174.3	18.1743	324.542	324542	324.542

## Sheet: 8min OD Calc B4 Convert
Date	Sample Name	8min OD	(Exp +H) - (MM Con +H)	ng/ml APC		fmols/ml	pmol/ml	pmol/ml/cm2	pM/cm2	nM/cm2
2013-03-04	SEV CREB 908 +R	0.41	-0.19	-2400		-40678	-40.678	-726.392	-726392	-726.392
24wk F	Sev CREB 908 -R	0.7		-1450		-24576.3	-24.5763	596.67	596670	596.67
	MM Con +R	0.6		-1450		-24576.3	-24.5763	463.734	463734	463.734
	MM Con -R	0.77		-1450		-24576.3	-24.5763	910.616	910616	910.616
2013-03-06	SEV CREB 938 +R	0.52	0.17	433.5		7347.46	7.34746	590.496	590496	590.496
24wk F	Sev CREB 938 -R	0.54		-416.5		-7059.32	-7.05932	1223.12	1.22312e+06	1223.12
	LM WT 936 +R	0.62	0.27	933.5		15822	15.822	810.469	810469	810.469
	LM WT 936 -R	0.48		-416.5		-7059.32	-7.05932	1063.36	1.06336e+06	1063.36
	MM Con +R	0.35		-416.5		-7059.32	-7.05932	520.651	520651	520.651
	MM Con -R	0.5		-416.5		-7059.32	-7.05932	1456.74	1.45674e+06	1456.74
2013-04-11	SEV CREB 971 +H	0.67	0.54	1732.67		29367.2	29.3672	524.415	524415	524.415
12wk F	SEV CREB 971 -H	0.55		1766		29932.2	29.9322	534.504	534504	534.504
	LM WT 968 +H	0.23	0.1	266		4508.47	4.50847	80.5085	80508.5	80.5085
	LM WT 968 -H	0.35		1099.33		18632.8	18.6328	332.728	332728	332.728
	MM Con +H	0.13		366		6203.39	6.20339	110.775	110775	110.775
	MM Con -H	0.8		2599.33		44056.5	44.0565	786.723	786723	786.723
2013-05-17	SC 972 +H	0.19	0.1	164.333		2785.31	2.78531	49.7377	49737.7	49.7377
16wk F	SC 973 -H			-169		-2864.41	-2.86441	-51.1501	-51150.1	-51.1501
	LM WT 978 +H	0.23	0.14	297.667		5045.2	5.0452	90.0928	90092.8	90.0928
	LM WT 978 -H	0.29		797.667		13519.8	13.5198	241.425	241425	241.425
	MM Con +H	0.09		131		2220.34	2.22034	39.6489	39648.9	39.6489
	MM Con -H	0.75		2331		39508.5	39.5085	705.508	705508	705.508
2013-07-12	Sev CREB 7 +H	0.34	0.21	446.6		7569.49	7.56949	135.169	135169	135.169
20wk F	Sev CREB 7 -H	0.28		586.6		9942.37	9.94237	177.542	177542	177.542
	WT 9 +H	0.2	0.07	166.6		2823.73	2.82373	50.4237	50423.7	50.4237
	WT 9 -H	0.35		726.6		12315.3	12.3153	219.915	219915	219.915
	MM Con +H	0.13		286.6		4857.63	4.85763	86.7433	86743.3	86.7433
	MM Con -H	0.68		1386.6		23501.7	23.5017	419.673	419673	419.673
2013-10-04	SEV CREB 998 +H	0.31	0.44	878.8		14894.9	14.8949	265.981	265981	265.981
32wk F	SEV CREB 998 - H	0.22		438.8		7437.29	7.43729	132.809	132809	132.809
	LM WT 10 +H	0.13	0.26	518.8		8793.22	8.79322	157.022	157022	157.022
	LM WT 10 -H	0.19		378.8		6420.34	6.42034	114.649	114649	114.649
	MM Con +H	-0.13		-261.2		-4427.12	-4.42712	-79.0557	-79055.7	-79.0557
	MM Con -H	0.56		1118.8		18962.7	18.9627	338.62	338620	338.62
						0	0	0	0	0
2014-03-11	Sev Creb 24 +H	0.81	0.53	574.714		9740.92	9.74092	173.945	173945	173.945
46wk M	Sev Creb 24 -H	0.88		1074.71		18215.5	18.2155	325.277	325277	325.277
	LM WT 15 +H	1.33	1.05	1317.57		22331.7	22.3317	398.781	398781	398.781
	LM WT 15 -H	1.36		1760.43		29837.8	29.8378	532.817	532817	532.817
	MM Con +H	0.28		217.571		3687.65	3.68765	65.8509	65850.9	65.8509
	MM Con - H	1.09		1374.71		23300.2	23.3002	416.076	416076	416.076
						0	0	0	0	0
2014-03-13	Mild Creb 166 +H	0.87	0.46	707		11983.1	11.9831	213.983	213983	213.983
16 wk M	Mild Creb 166 -H	0.89		1782		30203.4	30.2034	539.346	539346	539.346
	LM WT 165 +H	1.6	1.19	2532		42915.3	42.9153	766.344	766344	766.344
	LM WT 165 -H	1.7		3807		64525.4	64.5254	1152.24	1.15224e+06	1152.24
	MM Con +H	0.41		582		9864.41	9.86441	176.15	176150	176.15
	MM Con -H	1.1		2307		39101.7	39.1017	698.245	698245	698.245
						0	0	0	0	0
2014-03-13	Mild Creb 168 +H	0.96	0.58	593.143		10053.3	10.0533	179.523	179523	179.523
16 wk M	Mild Creb 168 -H	1.2		1478.86		25065.4	25.0654	447.596	447596	447.596
	LM WT 167 +H	1.2	0.82	936		15864.4	15.8644	283.293	283293	283.293
	LM WT 167 -H	1		1193.14		20222.8	20.2228	361.121	361121	361.121
	MM Con +H	0.38		307.429		5210.65	5.21065	93.0474	93047.4	93.0474
	MM Con -H	0.95		1121.71		19012.1	19.0121	339.502	339502	339.502
						0	0	0	0	0
2014-03-24	Sev Creb 143 +H	0.04	0.34	314.667		5333.33	5.33333	95.2381	95238.1	95.2381
20wk F	Sev Creb 143 -H	0.04		-185.333		-3141.24	-3.14124	-56.0936	-56093.6	-56.0936
	MM Con +H	-0.3		-752		-12745.8	-12.7458	-227.603	-227603	-227.603
	MM Con -H	0.1		-85.3333		-1446.33	-1.44633	-25.8273	-25827.3	-25.8273
						0	0	0	0	0
	LM WT 144 +H	1.5	1.15	1377.71		23351.1	23.3511	416.984	416984	416.984
	LM WT 144 -H	1.5		1877.71		31825.7	31.8257	568.315	568315	568.315
	MM Con +H	0.35		234.857		3980.63	3.98063	71.0827	71082.7	71.0827
	MM Con -H	1.04		1220.57		20687.7	20.6877	369.422	369422	369.422
						0	0	0	0	0
	30 minute incubations					0	0	0	0	0
2014-03-25	Mild Creb 177 +H	0.51	0.23	170.75		2894.07	2.89407	51.6798	51679.8	51.6798
12 wk F	Mild Creb 177 -H	0.88		1795.75		30436.4	30.4364	543.508	543508	543.508
	MM Con +H	0.28		295.75		5012.71	5.01271	89.5127	89512.7	89.5127
	MM Con -H	1		2095.75		35521.2	35.5212	634.307	634307	634.307
	LM WT 176 +H	0.31	0.04	-304.25		-5156.78	-5.15678	-92.0854	-92085.4	-92.0854
	LM WT 176 -H	1.02		2145.75		36368.6	36.3686	649.44	649440	649.44
	MM Con +H	0.27		270.75		4588.98	4.58898	81.9461	81946.1	81.9461
	MM Con -H	1.03		2170.75		36792.4	36.7924	657.007	657007	657.007
	60 min incubation
	WT 176 +H	0.99	0.8	1595.75		27046.6	27.0466	482.975	482975	482.975
	WT 176 -H	0.83		1670.75		28317.8	28.3178	505.675	505675	505.675
	MM Con +H	0.19		70.75		1199.15	1.19915	21.4134	21413.4	21.4134
	Mm Con -H	1		2095.75		35521.2	35.5212	634.307	634307	634.307
						0	0	0	0	0
2014-03-26	30min incubation					0	0	0	0	0
12 wk M	Mild Creb 182 +H	0.69	0.58	1045		17711.9	17.7119	316.283	316283	316.283
	Mild Creb 182 -H	0.69		1320		22372.9	22.3729	399.516	399516	399.516
	MM Con +H	0.11		-130		-2203.39	-2.20339	-39.3462	-39346.2	-39.3462
	MM Con -H	0.94		1945		32966.1	32.9661	588.68	588680	588.68
						0	0	0	0	0
	LM WT 183 +H	0.71	0.61	706.571		11975.8	11.9758	213.853	213853	213.853
	LM WT 183 -H	1.13		1449.43		24566.6	24.5666	438.689	438689	438.689
	MM Con +H	0.1		-22		-372.881	-0.372881	-6.6586	-6658.6	-6.6586
	MM Con -H	1		1263.71		21418.9	21.4189	382.48	382480	382.48
						0	0	0	0	0
2014-03-27	30 min inc					0	0	0	0	0
33 wk M	Res Creb 73 +H	0.37	0.22	152.667		2587.57	2.58757	46.2066	46206.6	46.2066
	Res Creb 73 -H	0.65		869.333		14734.5	14.7345	263.115	263115	263.115
	MM Con +H	0.15		36		610.169	0.610169	10.8959	10895.9	10.8959
	MM Con -H	0.9		1286		21796.6	21.7966	389.225	389225	389.225
						0	0	0	0	0
	LM WT 80 +H	0.62	0.46	429.429		7278.45	7.27845	129.972	129972	129.972
	LM WT 80 -H	0.69		758		12847.5	12.8475	229.419	229419	229.419
	Mm Con +H	0.16		0.857143		14.5278	0.0145278	0.259426	259.426	0.259426
	MM Con -H	0.86		1000.86		16963.7	16.9637	302.923	302923	302.923
45 wk M	Res Creb 22 +H	0.53	0.38	419.333		7107.34	7.10734	126.917	126917	126.917
	Res Creb 22 -H	0.59		769.333		13039.5	13.0395	232.849	232849	232.849
	MM Con +H	0.15		36		610.169	0.610169	10.8959	10895.9	10.8959
	MM Con -H	0.94		1352.67		22926.6	22.9266	409.403	409403	409.403
						0	0	0	0	0
2014-03-28	Sev Creb 192 +H	0.74	0.56	721		12220.3	12.2203	218.22	218220	218.22
8 wk F	Sev Creb 192 -H	1.01		1471		24932.2	24.9322	445.218	445218	445.218
	MM Con +H	0.18		87.6667		1485.88	1.48588	26.5335	26533.5	26.5335
	Mm Con -H	0.99		1437.67		24367.2	24.3672	435.129	435129	435.129
						0	0	0	0	0
2014-04-24	Sev Creb 142 +H	0.31	0.12	-70.5714		-1196.13	-1.19613	-21.3594	-21359.4	-21.3594
20 wk F	Sev Creb 142 -H	0.86		986.571		16721.5	16.7215	298.599	298599	298.599
	Res Creb 95 +H	0.36	0.17	0.857143		14.5278	0.0145278	0.259426	259.426	0.259426
31wk F	Res Creb 95 -H	0.6		615.143		10426.2	10.4262	186.181	186181	186.181
	MM Con +H	0.19		29.4286		498.789	0.498789	8.90695	8906.95	8.90695
	MM Con -H	0.92		1072.29		18174.3	18.1743	324.542	324542	324.542

## Sheet: Vmax +H only WH
Date	Sample Name	vmax	vmax	ng/ml APC		fmols/ml	pmol/ml	pmol/ml/cm2	pM/cm2	nM/cm2	heart weight (g)	nM/cm2/heart weight	delta nM/cm2 from wt littermate	APC
2013-03-04	SEV CREB 908 +R	60.8	60.8	979.502		16601.7	16.6017	296.46	296460	296.46	0.2049	1446.85		nM/cm2/g				nM/cm2/mg
24wk F	Sev CREB 908 -R	122	122	1971.4		33413.5	33.4135	596.67	596670	596.67	0.2049	2912.01		WT	Mild	Sev	Res	WT	Mild	Sev	Res
	MM Con +R	94.9	94.9	1532.18		25969.1	25.9691	463.734	463734	463.734		#DIV/0!		1439.25				1.43925
	MM Con -R	186	186	3008.68		50994.5	50.9945	910.616	910616	910.616		#DIV/0!		1283.28				1.28328
												#DIV/0!		1375.54		730.646		1.37554		0.730646
2013-03-06	SEV CREB 938 +R	76.1	76.1	1951		33067.8	33.0678	590.496	590496	590.496	0.2429	2431.03	-219.973			630.323				0.630323
24wk F	Sev CREB 938 -R	154.9	154.9	4041.19		68494.7	68.4947	1223.12	1.22312e+06	1223.12	0.2429	5035.48		904.896		409.652		0.904896		0.409652
	LM WT 936 +R	103.5	103.5	2677.79		45386.3	45.3863	810.469	810469	810.469	0.17	4767.47			413.39				0.41339
	LM WT 936 -R	135	135	3513.33		59548	59.548	1063.36	1.06336e+06	1063.36	0.17	6255.05			214.255				0.214255
	MM Con +R	67.4	67.4	1720.23		29156.5	29.1565	520.651	520651	520.651		#DIV/0!
	MM Con -R	184	184	4813.07		81577.4	81.5774	1456.74	1.45674e+06	1456.74		#DIV/0!			118.569				0.118568
												#DIV/0!
2013-04-11	SEV CREB 971 +H	74.84	74.84	1428.23		24207.3	24.2073	432.273	432273	432.273	0.2382	1814.75	257.553
12wk F	SEV CREB 971 -H	124.96	124.96	2384.72		40418.9	40.4189	721.767	721767	721.767	0.2382	3030.09		945.09	588.886			0.94509	0.588886
	LM WT 968 +H	30.25	30.25	577.275		9784.32	9.78432	174.72	174720	174.72	0.1954	894.166
	LM WT 968 -H	48.69	48.69	929.183		15748.9	15.7489	281.23	281230	281.23	0.1954	1439.25		1045.17			787.607	1.04517			0.787607
	MM Con +R	16.1	16.1	307.237		5207.4	5.2074	92.9893	92989.3	92.9893		#DIV/0!					530.235				0.530235
	MM Con -R	184	184	3511.44		59515.8	59.5158	1062.78	1.06278e+06	1062.78		#DIV/0!
												#DIV/0!				912.99				0.912991
2013-05-17	SC 973 +H	24.8	24.8	435.05		7373.72	7.37372	131.674	131674	131.674	0.2158	610.165	-36.4913				665.738				0.665738
16wk F	SC 973 -H	0.09	0.09	-149.111		-2527.31	-2.52731	-45.1305	-45130.5	-45.1305	0.2158	-209.131
	LM WT 978 +H	29.9	29.9	555.617		9417.24	9.41724	168.165	168165	168.165	0.1868	900.241
	LM WT 978 -H	39.9	39.9	792.024		13424.1	13.4241	239.717	239717	239.717	0.1868	1283.28
	MM Con +H	11.7	11.7	125.357		2124.69	2.12469	37.941	37941	37.941		#DIV/0!
	MM Con -H	151	151	3418.5		57940.7	57.9407	1034.66	1.03466e+06	1034.66		#DIV/0!
												#DIV/0!
2013-07-12	Sev CREB 7 +H	48.9	48.9	767.711		13012	13.012	232.358	232358	232.358	0.2483	935.795	110.779
20wk F	Sev CREB 7 -H	38.6	38.6	599.41		10159.5	10.1595	181.42	181420	181.42	0.2483	730.647
	WT 9 +H	26.5	26.5	401.698		6808.44	6.80844	121.579	121579	121.579	0.17	715.172
	WT 9 -H	49.2	49.2	772.613		13095.1	13.0951	233.842	233842	233.842	0.17	1375.54
	MM Con +H	16.3	16.3	235.031		3983.58	3.98358	71.1353	71135.3	71.1353		#DIV/0!
	MM Con -H	158	158	2550.39		43227	43.227	771.91	771910	771.91		#DIV/0!
												#DIV/0!
2013-10-04	SEV CREB 998 +H	49.4	49.4	701.487		11889.6	11.8896	212.315	212315	212.315	0.2252	942.782	136.221
32wk F	SEV CREB 998 - H	33.8	33.8	468.999		7949.13	7.94913	141.949	141949	141.949	0.2252	630.323
	LM WT 10 +H	19.2	19.2	251.413		4261.23	4.26123	76.0935	76093.5	76.0935	0.1886	403.465
	LM WT 10 -H	28.2	28.2	385.541		6534.59	6.53459	116.689	116689	116.689	0.1886	618.712
	MM Con +H	1	1	-19.8241		-336.002	-0.336002	-6.00004	-6000.04	-6.00004		#DIV/0!
	MM Con -H	143	143	2096.42		35532.5	35.5325	634.51	634510	634.51		#DIV/0!
						0	0	0	0	0		#DIV/0!
2014-03-11	Sev Creb 24 +H	29.3	29.3	329.835		5590.42	5.59042	99.829	99829	99.829	0.3491	285.961	16.7924
46wk M	Sev Creb 24 -H	40.1	40.1	472.503		8008.53	8.00853	143.009	143009	143.009	0.3491	409.652
	LM WT 15 +H	25.1	25.1	274.353		4650.05	4.65005	83.0365	83036.5	83.0365	0.1629	509.739
	LM WT 15 -H	41.2	41.2	487.034		8254.82	8.25482	147.407	147407	147.407	0.1629	904.896
	MM Con +H	34	34	391.922		6642.75	6.64275	118.62	118620	118.62		#DIV/0!
	MM Con - H	249	249	3232.08		54781	54.781	978.233	978233	978.233		#DIV/0!
						0	0	0	0	0		#DIV/0!
2014-03-13	Mild Creb 166 +H	11.7	11.7	106.654		1807.7	1.8077	32.2803	32280.3	32.2803	0.1851	174.394	-64.1455
16 wk M	Mild Creb 166 -H	23.7	23.7	252.817		4285.04	4.28504	76.5186	76518.6	76.5186	0.1851	413.39
	LM WT 165 +H	29.1	29.1	318.591		5399.84	5.39984	96.4258	96425.8	96.4258	0.2485	388.031
	LM WT 165 -H	27.9	27.9	303.974		5152.11	5.15211	92.0019	92001.9	92.0019	0.2485	370.229
	MM Con +H	52.2	52.2	599.955		10168.7	10.1687	181.584	181584	181.584		#DIV/0!
	MM Con -H	254	254	3057.93		51829.4	51.8294	925.525	925525	925.525		#DIV/0!
						0	0	0	0	0		#DIV/0!
2014-03-13	Mild Creb 168 +H	9.76	9.76	-144.801		-2454.26	-2.45426	-43.8261	-43826.1	-43.8261	0.1815	-241.466	-34.6369
16 wk M	Mild Creb 168 -H	24.9	24.9	128.484		2177.69	2.17769	38.8873	38887.3	38.8873	0.1815	214.255
	LM WT 167 +H	16.1	16.1	-30.361		-514.593	-0.514593	-9.18917	-9189.17	-9.18917	0.179	-51.3361
	LM WT 167 -H	39.3	39.3	388.412		6583.25	6.58325	117.558	117558	117.558	0.179	656.748
	MM Con +H	41.2	41.2	422.708		7164.54	7.16454	127.938	127938	127.938		#DIV/0!
	MM Con -H	198	198	3253.03		55136.1	55.1361	984.574	984574	984.574		#DIV/0!
						0	0	0	0	0		#DIV/0!
2014-03-24	Sev Creb 143 +H	-184	-184	-2449.93		-41524.3	-41.5243	-741.505	-741505	-741.505	0.1996	-3714.96	-842.882
20wk F	Sev Creb 143 -H	-184	-184	-2449.93		-41524.3	-41.5243	-741.505	-741505	-741.505	0.1996	-3714.96
	MM Con +H	-180	-180	-2397.44		-40634.6	-40.6346	-725.617	-725617	-725.617		#DIV/0!
	MM Con -H	19.6	19.6	221.983		3762.42	3.76242	67.1861	67186.1	67.1861		#DIV/0!
						0	0	0	0	0		#DIV/0!
	LM WT 144 +H	28.3	28.3	334.948		5677.08	5.67708	101.376	101376	101.376	0.1521	666.512
	LM WT 144 -H	26	26	305.611		5179.85	5.17985	92.4973	92497.3	92.4973	0.1521	608.135
	MM Con +H	39.6	39.6	479.08		8120.01	8.12001	145	145000	145		#DIV/0!
	MM Con -H	214	214	2703.57		45823.2	45.8232	818.272	818272	818.272		#DIV/0!
						0	0	0	0	0		#DIV/0!
	30 minute incubations					0	0	0	0	0		#DIV/0!
2014-03-25	Mild Creb 177 +H	26.3	26.3	23.4625		397.669	0.397669	7.10124	7101.24	7.10124	0.1694	41.92	-0.0302663
12 wk F	Mild Creb 177 -H	69.2	69.2	66.3625		1124.79	1.12479	20.0855	20085.5	20.0855	0.1694	118.568
	MM Con +H	34.2	34.2	31.3625		531.568	0.531568	9.49228	9492.28	9.49228		#DIV/0!
	MM Con -H	223	223	220.162		3731.57	3.73157	66.6351	66635.1	66.6351		#DIV/0!
						0	0	0	0	0		#DIV/0!
	LM WT 176 +H	26.4	26.4	23.5625		399.364	0.399364	7.13151	7131.51	7.13151	0.1306	54.6057
	LM WT 176 -H	191	191	188.162		3189.19	3.18919	56.9499	56949.9	56.9499	0.1306	436.064
	MM Con +H	27.6	27.6	24.7625		419.703	0.419703	7.4947	7494.7	7.4947		#DIV/0!
	MM Con -H	232	232	229.162		3884.11	3.88411	69.3591	69359.1	69.3591		#DIV/0!
						0	0	0	0	0		#DIV/0!
	60 min incubation					0	0	0	0	0		#DIV/0!
	WT 176 +H	16.4	16.4	13.5625		229.873	0.229873	4.10487	4104.87	4.10487	0.1306	31.4309
	WT 176 -H	40.8	40.8	37.9625		643.432	0.643432	11.4899	11489.9	11.4899	0.1306	87.9775
	MM Con +H	23.1	23.1	20.2625		343.432	0.343432	6.13272	6132.72	6.13272		#DIV/0!
	Mm Con -H	236	236	233.162		3951.91	3.95191	70.5698	70569.8	70.5698		#DIV/0!
						0	0	0	0	0		#DIV/0!
2014-03-26	30min incubation					0	0	0	0	0		#DIV/0!
12 wk M	Mild Creb 182 +H	11.1	11.1	112.397		1905.04	1.90504	34.0185	34018.5	34.0185	0.1676	202.975	-28.9101
	Mild Creb 182 -H	26.7	26.7	326.096		5527.05	5.52705	98.6973	98697.3	98.6973	0.1676	588.886
	MM Con +H	13.2	13.2	141.164		2392.62	2.39262	42.7253	42725.3	42.7253		#DIV/0!
	MM Con -H	168	168	2261.71		38334.1	38.3341	684.538	684538	684.538		#DIV/0!
						0	0	0	0	0		#DIV/0!
	LM WT 183 +H	19.3	19.3	207.916		3524	3.524	62.9286	62928.6	62.9286	0.2006	313.702
	LM WT 183 -H	63.7	63.7	626.389		10616.8	10.6168	189.585	189585	189.585	0.2006	945.09
	MM Con +H	13	13	148.538		2517.6	2.5176	44.9571	44957.1	44.9571		#DIV/0!
	MM Con -H	219	219	2090.1		35425.5	35.4255	632.598	632598	632.598		#DIV/0!
						0	0	0	0	0		#DIV/0!
2014-03-27	30 min inc					0	0	0	0	0		#DIV/0!
33 wk M	Res Creb 73 +H	21.8	21.8	267.393		4532.08	4.53208	80.93	80930	80.93	0.2099	385.565	55.0052
	Res Creb 73 -H	42.6	42.6	546.213		9257.85	9.25785	165.319	165319	165.319	0.2099	787.607
	MM Con +H	23.1	23.1	284.819		4827.44	4.82744	86.2043	86204.3	86.2043		#DIV/0!
	MM Con -H	207	207	2749.97		46609.6	46.6096	832.314	832314	832.314		#DIV/0!
						0	0	0	0	0		#DIV/0!
	LM WT 80 +H	15.5	15.5	85.6557		1451.79	1.45179	25.9249	25924.9	25.9249	0.2052	126.339
	LM WT 80 -H	53.5	53.5	708.607		12010.3	12.0103	214.469	214469	214.469	0.2052	1045.17
	Mm Con +H	25.7	25.7	252.869		4285.91	4.28591	76.5342	76534.2	76.5342		#DIV/0!
	MM Con -H	205	205	3192.21		54105.3	54.1053	966.166	966166	966.166		#DIV/0!
						0	0	0	0	0		#DIV/0!
45 wk M	Res Creb 22 +H	13.4	13.4	154.792		2623.6	2.6236	46.8499	46849.9	46.8499	0.2697	173.711
	Res Creb 22 -H	37.1	37.1	472.487		8008.25	8.00825	143.004	143004	143.004	0.2697	530.235
	MM Con +H	22.4	22.4	275.436		4668.4	4.6684	83.3643	83364.3	83.3643		#DIV/0!
	MM Con -H	205	205	2723.16		46155.2	46.1552	824.2	824200	824.2		#DIV/0!
						0	0	0	0	0		#DIV/0!
2014-03-28	Sev Creb 192 +H	78.3	78.3	3790.91		64252.6	64.2526	1147.37	1.14737e+06	1147.37	0.1834	6256.1
8 wk F	Sev Creb 192 -H	167	167	8225.91		139422	139.422	2489.68	2.48968e+06	2489.68	0.1834	13575.1
	MM Con +H	22	22	975.905		16540.8	16.5408	295.371	295371	295.371		#DIV/0!
	Mm Con -H	287	287	14225.9		241117	241.117	4305.66	4.30566e+06	4305.66		#DIV/0!
						0	0	0	0	0		#DIV/0!
2014-04-24	Sev Creb 142 +H	0.38	0.38	39.1818		664.099	0.664099	11.8589	11858.9	11.8589	0.2237	53.0125
20 wk F	Sev Creb 142 -H	68.2	68.2	674.796		11437.2	11.4372	204.236	204236	204.236	0.2237	912.991
	Res Creb 95 +H	15.5	15.5	180.888		3065.89	3.06589	54.748	54748	54.748	0.2058	266.025
31wk F	Res Creb 95 -H	44.5	44.5	452.678		7672.5	7.6725	137.009	137009	137.009	0.2058	665.738
	MM Con +H	22.3	22.3	244.618		4146.06	4.14606	74.0368	74036.8	74.0368		#DIV/0!
	MM Con -H	254	254	2416.13		40951.3	40.9513	731.273	731273	731.273		#DIV/0!
Date	Sample Name		vmax	Lag Time	Corrected Vmax	ng/ml APC		fmols/ml	pmol/ml	pmol/ml/cm2	pM/cm2	nM/cm2	delta nM/cm2 from wt littermate			Delta
2012-12-27	Sev CREB 961 +R		12.5		12.5	274.858		4658.61	4.65861	83.1895	83189.5	83.1895	43.851			52.7901
	Sev CREB 961 -R		63	808s	20	449.277		7614.86	7.61486	135.98	135980	135.98
	LM WT 959 +R		-29.23	1604s	6.27	129.974		2202.96	2.20296	39.3385	39338.5	39.3385				11.1915
	LM WT 959 -R		7.86	1320s	7.86	166.951		2829.68	2.82968	50.53	50530	50.53
2013-12-28	Mild CREB 942 +R		9.9		9.9	105.409		1786.6	1.7866	31.9036	31903.6	31.9036	-65.6264			9.53012
	Mild CREB 942 -R		24.72	631s	12.8	136.897		2320.29	2.32029	41.4337	41433.7	41.4337
	LM WT 943 +R		29.87		29.87	322.239		5461.68	5.46168	97.5299	97529.9	97.5299				-52.4814
	LM WT 943 -R		14.17	454s	13.9	148.84		2522.72	2.52272	45.0485	45048.5	45.0485
2013-01-02	Mild CREB 960 +R		-0.3		-0.3	-45.3542		-768.716	-0.768716	-13.7271	-13727.1	-13.7271	-77.0619			47.6518
	Mild CREB 960 -R		12.5		12.5	112.087		1899.79	1.89979	33.9247	33924.7	33.9247
	LM WT 958 +R		-39.26	508s	20.4	209.258		3546.75	3.54675	63.3348	63334.8	63.3348				-45.4181
	LM WT 958 -R		8.26	2039s	8.2	59.1968		1003.34	1.00334	17.9167	17916.7	17.9167
2013-01-07	Mild CREB 964 +R		6.28		6.28	37.2452		631.274	0.631274	11.2728	11272.8	11.2728	-5.26371			36.9922
	Mild CREB 965 -R		16.4		16.4	159.467		2702.84	2.70284	48.2649	48264.9	48.2649
	LM WT 953 +R		7.72		7.72	54.6365		926.042	0.926042	16.5365	16536.5	16.5365				28.8042
	LM WT 953 -R		15.6		15.6	149.806		2539.08	2.53908	45.3407	45340.7	45.3407
2013-01-10	Sev CREB 913 +R		2.56	152s	2.81	22.8807		387.808	0.387808	6.92515	6925.15	6.92515	3.0529			35.7484
	Sev CREB 913 -R		13.7		13.7	140.993		2389.72	2.38972	42.6736	42673.6	42.6736
	LM WT 915 +R		1.88	808s	1.88	12.7939		216.846	0.216846	3.87225	3872.25	3.87225				66.0476
	LM WT 915 -R		22.2	123s	22	231.015		3915.51	3.91551	69.9198	69919.8	69.9198
