# Supplementary material for: Endocardial Endothelial Dysfunction Progressively Disrupts Initially Anti then Pro-Thrombotic Pathways in Heart Failure Mice
Source: PLoS One. 2015 Nov 13;10(11):e0142940. doi: 10.1371/journal.pone.0142940 (PMC4643996; doi:10.1371/journal.pone.0142940)
Supplement: S13 Data — (XLSX) [file pone.0142940.s013.xlsx]

## Sheet: Sheet1
Wildtype	Wildtype + IIa	HF	HF + IIa		Early HF	Early HF + IIa	Acute HF	Acute HF + IIa	Chronic HF	Chronic HF + IIa
0.637297	1.29408	0.845544	1.67853		0.845544	1.67853	0.973696	0.989715	1.71057	0.685354
0.669335	1.21398	0.90962	3.00811		0.90962	3.00811	0.781468	1.00573	0.58924	0.236822
0.701373	2.1591	1.03777	1.00573		1.03777	1.00573	0.797487	0.941658	0.461088	0.941658
0.653316	0.973696	0.461088	1.18194		0.461088	1.18194	0.845544	0.58924	1.06981	1.61446
0.637297	2.2392	1.06981	2.43142		1.06981	2.43142	0.861563	0.861563	0.621278	0.621278
		0.973696	0.989715						0.58924	0.797487
		0.781468	1.00573
		0.797487	0.941658
		0.845544	0.58924
		0.861563	0.861563
		1.71057	0.685354
		0.58924	0.236822
		0.461088	0.941658
		1.06981	1.61446
		0.621278	0.621278
		0.58924	0.797487
